# Supplementary material for: Chitosan-Based Oleogels: Emulsion Drying Kinetics and Physical, Rheological and Textural Characteristics of Olive Oil Oleogels
Source: Preprints.org preprint supplement (doi:10.20944/preprints202406.1056.v1), 2024-06-18
Supplement: Supplementary file 1 [file supplementary]

## **Supplementary Material**

### **Chitosan-based oleogels: emulsion drying kinetics modelling and physical, rheological and textural characteristics of olive oil oleogels**

Authors: M. Lama, L. Montes, D. Franco, A. Franco-Uría, R. Moreira

## 1. Drying kinetics of 0.7% w/w chitosan emulsions

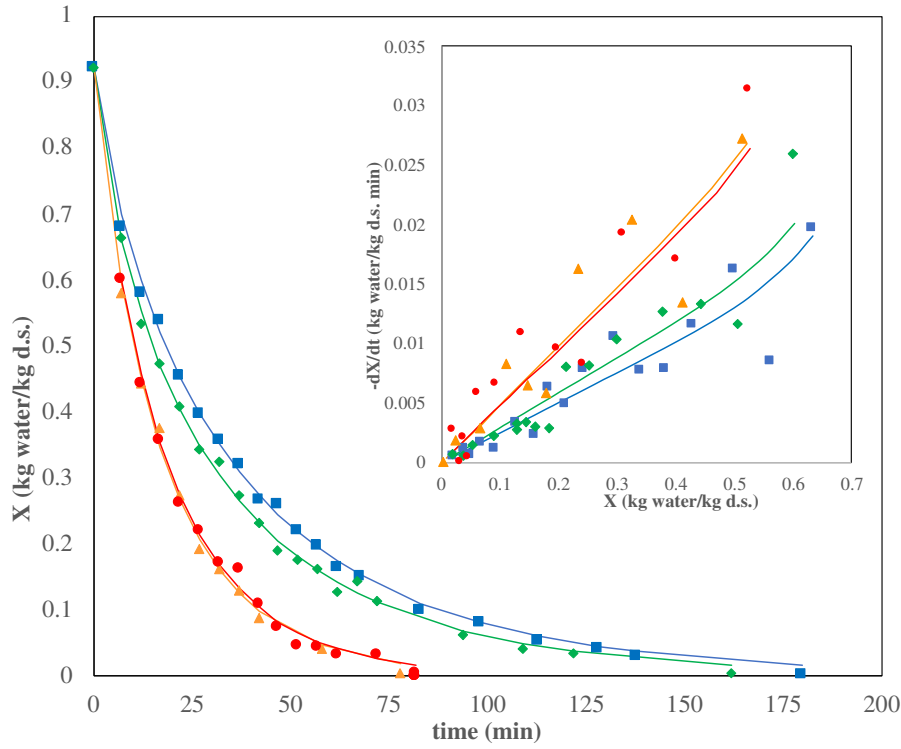

**Figure S1.** Drying kinetics (main plot) and specific drying rates (subplot) at different air temperatures (°C): (50 ■, 60 ◆, 70 ▲, 80 ●) for the 0.7% w/w chitosan emulsions. Lines corresponded to the Page model prediction (main plot) and the diffusional model (subplot)

## 2. Thickness variation during drying

In Figure S.2, the shrinking of a system can be determined by a logarithmic relationship between thickness and moisture.

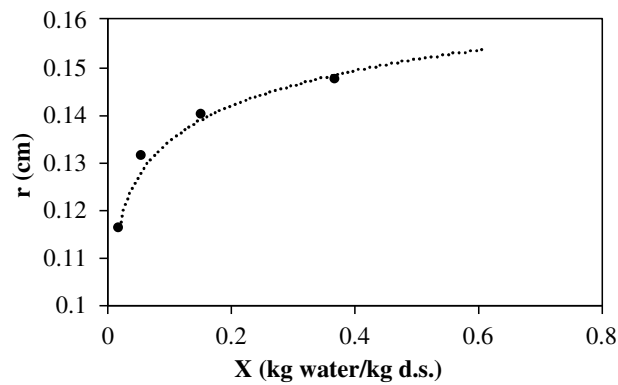

**Figure S2.** Logarithmic relationship thickness vs moisture for the system 0.7% chitosan and 70°C

This relationship is defined by Eq. S.1:

$$r(X) = 0.0107 \ln(X) + 0.159$$

Where  $r$  is the thickness in m and  $X$  is the absolute moisture (kg water/kg d.s.). Fitting present an  $R^2=0.979$  and a RMSE of 0.00575.

### 3. Color

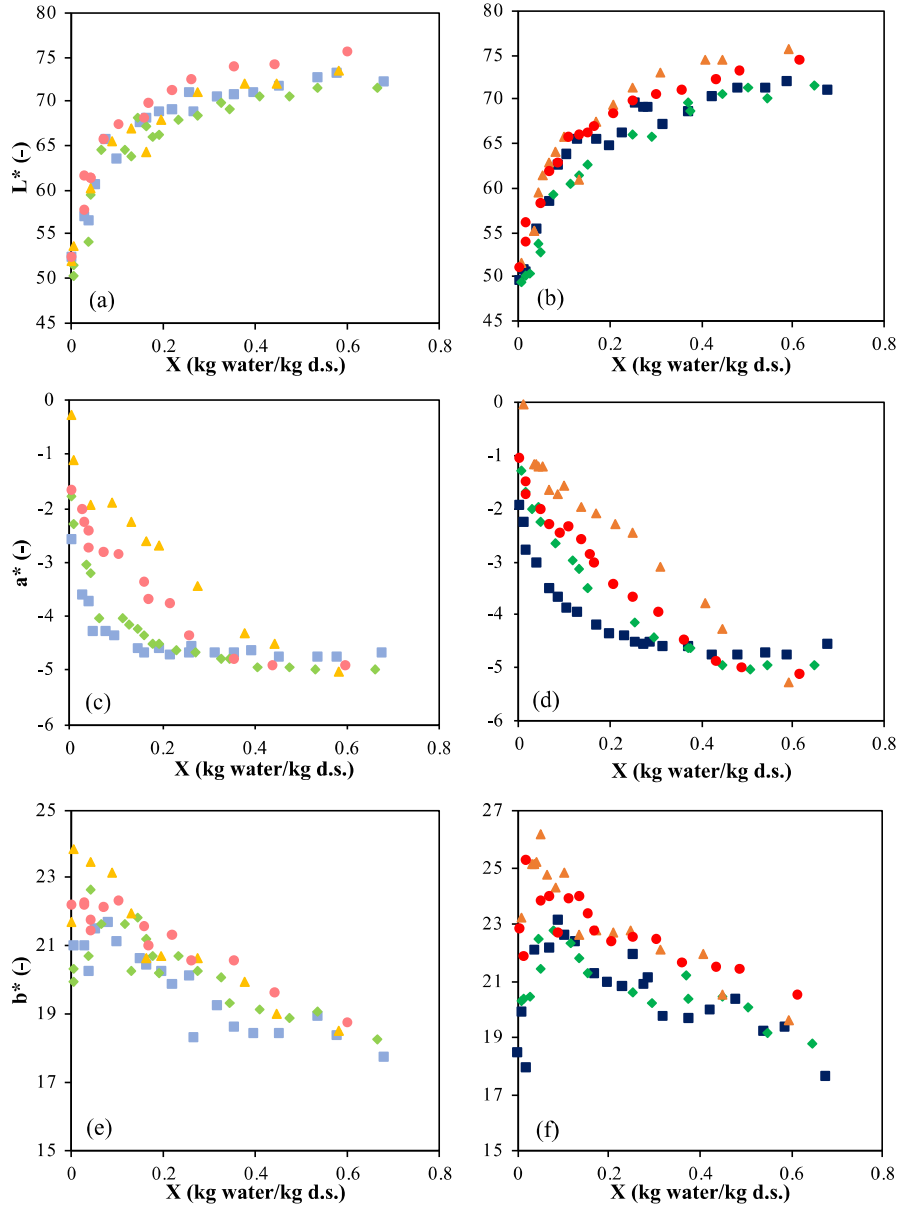

**Figure S3:** Color coordinates trend with drying time at different air temperatures (°C): (50 ■, 60 ◆, 70 ▲, 80 ●) for the 0.8% w/w chitosan emulsions (clearer colors for 0.7% w/w). (a), (b) Brightness coordinate ( $L^*$ ); (c), (d) red-green coordinate ( $a^*$ ); (e), (f) yellow-blue coordinate ( $b^*$ ).

**Table S1.** Initial values of color coordinates ( $L^*$ ,  $a^*$ ,  $b^*$ ) for all the tested systems. FD (Freeze-drying)

| Coordinate  | $L^*$            | $a^*$            | $b^*$            |
|-------------|------------------|------------------|------------------|
| Sample      |                  |                  |                  |
| 50°C – 0.7% | $72.38 \pm 0.94$ | $-4.26 \pm 0.08$ | $16.58 \pm 0.82$ |
| 50°C – 0.8% | $72.78 \pm 1.27$ | $-4.11 \pm 0.09$ | $16.57 \pm 0.69$ |
| 60°C – 0.7% | $71.12 \pm 1.05$ | $-4.36 \pm 0.10$ | $15.74 \pm 0.87$ |
| 60°C – 0.8% | $73.44 \pm 0.98$ | $-4.48 \pm 0.05$ | $17.15 \pm 0.56$ |
| 70°C – 0.7% | $74.15 \pm 2.74$ | $-4.50 \pm 0.07$ | $16.17 \pm 0.44$ |
| 70°C – 0.8% | $77.99 \pm 1.21$ | $-4.75 \pm 0.09$ | $16.97 \pm 0.70$ |
| 80°C – 0.7% | $76.68 \pm 1.13$ | $-4.43 \pm 0.08$ | $17.12 \pm 0.67$ |
| 80°C – 0.8% | $76.20 \pm 0.53$ | $-4.66 \pm 0.04$ | $19.18 \pm 0.36$ |
| FD – 0.7%   | $73.28 \pm 1.03$ | $-4.35 \pm 1.03$ | $17.26 \pm 0.52$ |
| FD – 0.8%   | $76.68 \pm 1.11$ | $-4.43 \pm 1.11$ | $17.12 \pm 0.68$ |

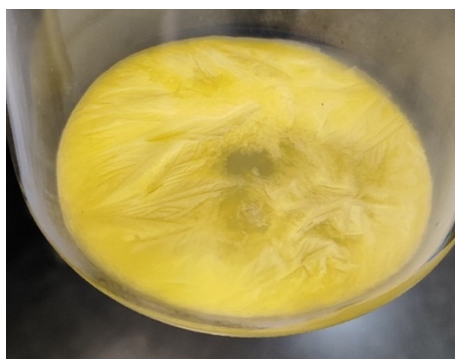

**Figure S4.** Freeze-dried sample with 0.7% chitosan after 48h storage.

#### 4. Rheological properties

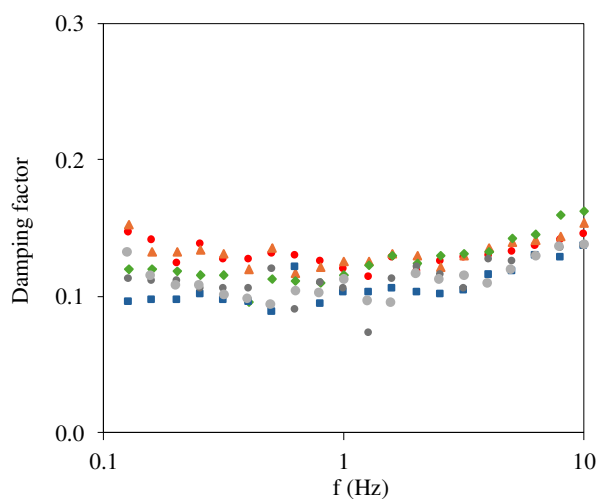

**Figure S5.** Viscous-elastic moduli ratio ( $G''/G' = \text{damping factor}$ ) with frequency of tested oleogels at different air temperatures ( $^{\circ}\text{C}$ ): (50  $\blacksquare$ , 60  $\blacklozenge$ , 70  $\blacktriangle$ , 80  $\bullet$ ) and freeze-dried ( $\bullet$ ) for the 0.8% w/w chitosan emulsions (clearer colors for 0.7% w/w).
